# Supplementary material for: Caloric Restriction Rejuvenates Skeletal Muscle Growth in Heart Failure With Preserved Ejection Fraction
Source: PubMed Central journal article supplement (PMC10950401; doi:10.1016/j.jacbts.2023.09.014), 2023-12-06
Supplement: mmc1.pdf [file mmc1.pdf]

|    |                               |
|----|-------------------------------|
| 1  | <b>Supplemental Appendix</b>  |
| 2  |                               |
| 3  | Supplemental Methods – P2     |
| 4  |                               |
| 5  | Supplemental Tables – P7      |
| 6  |                               |
| 7  | Supplemental Table 1 – P7     |
| 8  |                               |
| 9  | Supplemental Table 2 – P8     |
| 10 |                               |
| 11 | Supplemental Table 3 – P9     |
| 12 |                               |
| 13 | Supplemental Figures – P10    |
| 14 |                               |
| 15 | Supplemental Figure 1 – P10   |
| 16 |                               |
| 17 | Supplemental Figure 2 – P11   |
| 18 |                               |
| 19 | Supplemental Figure 3 – P12   |
| 20 |                               |
| 21 | Supplemental Figure 4 – P13   |
| 22 |                               |
| 23 | Supplemental Figure 5 – P14   |
| 24 |                               |
| 25 | Supplemental Figure 6 – P15   |
| 26 |                               |
| 27 | Supplemental Figure 7 – P16   |
| 28 |                               |
| 29 | Supplemental Figure 8 – P17   |
| 30 |                               |
| 31 | Supplemental Figure 9 – P18   |
| 32 |                               |
| 33 | Supplemental Figure 10 – P19  |
| 34 |                               |
| 35 | Supplemental References – P20 |
| 36 |                               |

## 37 **Supplemental Methods**

### 38 **Ethical approval**

39 Procedures and experiments in rats treated with cardiovascular medications (i.e., Sac/Val)  
40 were performed at the University of Oslo, Norway, and approved by the Norwegian Food  
41 Safety Authority committee (Mattilsynet) for animal research (FOTS protocol number 15886)  
42 in accordance with the national regulations, the European Convention for the Protection of  
43 Vertebrate Animals used for Experimental and Other Scientific Purposes (ETS No.123), and  
44 the European Directive 2010/63/EU on the protection of animals used for scientific purposes.  
45 All other procedures and experiments were performed in accordance with the UK Scientific  
46 Procedures (Animals) Act 1986 and local approval was given by the University of Leeds  
47 Animal Welfare and Ethical Review Committee (70/08674). For the clinical study, all  
48 participants provided written informed consent, with research protocols approved by the  
49 University of Leipzig Ethics Committee<sup>1</sup>.

### 51 **Animals**

52 Male obese (HFpEF) and lean (controls) diabetic Zucker fatty/spontaneously hypertensive  
53 heart failure F1 hybrid (ZSF1) rats were purchased from Charles River at 13-18 weeks of age.  
54 This hybrid rat is a cross between a ZDF female and an SHHF male rat. Whereas both lean  
55 and obese ZSF1 rats inherit the hypertension gene, only the obese ZSF1 rats inherit a  
56 mutation in the leptin receptor gene (*Lepr<sup>fa</sup>Lepr<sup>cp</sup>/Cr1*) that drives weight gain and associated  
57 metabolic impairments, with typical signs of HFpEF developing as early as 10 weeks of age<sup>2</sup>  
58 and well established after 20 weeks<sup>2, 3, 4, 5, 6, 7, 8, 9, 10</sup>. All rats were kept at a 12 h light/dark cycle.  
59 Unless stated, rats were fed *ad libitum* with standard chow and access to water.

### 61 **Study design**

62 To evaluate the effects of cardiovascular medications (Sac/Val) in HFpEF skeletal muscle,  
63 obese male ZSF1 rats at 20 weeks of age were randomly assigned to the following groups:  
64 HFpEF+Vehicle (HFpEF+Veh; n=8) or HFpEF+Sac/Val (HFpEF+Sac/Val n=6); and compared  
65 to their respective lean controls (CON; n = 11). Sac/Val (68 mg/kg body mass/d) or vehicle  
66 was delivered via oral administration (gavage) for 10 weeks. In the second set of experiments,  
67 male lean (n=8) and obese (n=8) ZSF1 rats at 20 weeks of age underwent surgery to induce  
68 mechanical overload for 14 days of the extensor digitorum longus (EDL) muscle. In the third  
69 set of experiments, male lean (n=4), obese ZSF1 (n=4), and obese ZSF1 rats treated with  
70 dietary caloric restriction (HFpEF+CR) (n=4) were compared starting from 18 weeks of age,  
71 with overload induced at 20 weeks of age for 14 days. CR was initiated at week 1 at  
72 10% restriction, increased to 25% restriction in week 2, and maintained at  
73 40% restriction between weeks 3-4. The sample size for the CR intervention was determined  
74 using a *priori* power calculation based on the second set of experiments and a standard  
75 deviation (SD) for muscle size of 12% ( $\alpha = 0.05$ , power = 80%, 30% effect; n = 4 per group).

### 77 **Cardiometabolic function**

78 Cardiac function was assessed by transthoracic echocardiography using a VEVO 3100 high-  
79 resolution *in vivo* imaging system from VisualSonics. Briefly, animals were maintained under  
80 anesthesia (1.5-2% isoflurane mixed with 100% oxygen) on a pre-warmed ECG transducer  
81 pad with body temperature and ECG monitored. Measurements were made with an MS250  
82 transducer, frequency set at 20 MHz. B-mode measurements in the parasternal long axis view  
83 were obtained to assess the function and dimension of the left ventricle (LV). M-mode tracings  
84 through the aortic root and the left atrium (LA) were used to assess LA diameter. LVEF was  
85 calculated as  $100 * ((LV\ Vol;d - LV\ Vol;s) / LV\ Vol;d)$ . LV mass was estimated by the formula:  
86  $1.053 * ((LVID;d + LVPW;d + IVS;d)^3 - LVID;d^3)$ . Relative wall thickness (RWT) was calculated  
87 as  $2 * LVPW;d / LVID;d$ . E and A waves in LV filling velocities were assessed *via* pulsed-  
88 wave Doppler in the parasternal long axis view. Early (E wave) and late (A wave) ventricular  
89 filling velocities were assessed *via* pulsed-wave Doppler in an apical 4-chamber view.  
90 Myocardial velocities (e' and A') were measured using tissue Doppler imaging at the level of  
91 the basal septal segment of the LV in an apical 4-chamber view. Cardiac output (CO) was

92 estimated from the dimension of the LV on the M-mode view. Cardiometabolic impairments  
93 were confirmed by measures of body weight, mean arterial pressure (*via* an implanted carotid  
94 catheter; PP10) with a blood pressure transducer (BP transducer, AD Instruments, UK) and  
95 fasting blood glucose levels (*via* a commercial blood glucose meter; FreeStyle Mini Meter).

### 96 97 **Mechanical overload**

98 To induce EDL hypertrophy, unilateral surgical ablation of the TA was performed as previously  
99 described<sup>11</sup>. Briefly, rats were weighed and maintained under isoflurane anesthesia (2-3% in  
100 100% oxygen). Under aseptic conditions, the distal TA tendon was transected and the majority  
101 of the muscle belly separated using blunt dissection. The TA was removed near to its proximal  
102 insertion, while keeping the underlying EDL muscle intact. The contralateral limb was used for  
103 sham surgery, in which TA and EDL muscles were identified but not separated. Post-operative  
104 analgesia (buprenorphine; Vetergesic, Ceva, Amersham, UK; 0.05 mg/kg) and antibiotic  
105 (Enrofloxacin (“Baytril”); Bayer, Reading, UK; 2.5 mg/kg) were provided to all animals after  
106 surgery. All rats were ambulatory throughout the 14 day experimental period, and no  
107 postoperative complications were observed. The mechanical overload model allows a paired  
108 comparison between contralateral (non-overloaded) and overloaded muscles, which avoids  
109 biases resulting from the use of different animals<sup>12</sup>.

### 110 111 ***In situ* EDL muscle performance and femoral artery blood flow**

112 Function of the EDL muscle and femoral artery blood flow were evaluated *in situ* according to  
113 our published protocol<sup>13</sup>. Data from the relative control leg have been published previously<sup>13</sup>.  
114 Anesthesia was induced using isoflurane (4% in 100% oxygen) and maintained using a  
115 constant syringe pump infusion of (30-35 mg/kg/h) Alfaxalone (Jurox, Crawley, UK) *via* an  
116 implanted jugular vein catheter. EDL isometric forces were measured with a lever arm force  
117 transducer (305B-LR: Aurora Scientific, Aurora, ON, Canada). It was necessary in the sham  
118 surgery limb to remove the TA to provide unimpeded access to the underlying EDL. Optimal  
119 muscle length and supramaximal current delivery were determined by electric stimulation (1  
120 Hz, 0.3 ms pulse width) *via* electrodes placed adjacent to the popliteal nerve<sup>14</sup>. Simultaneous  
121 bilateral femoral artery blood flow was measured using perivascular flow probes (0.7PSB;  
122 Transonic, Ithaca, NY, USA)<sup>15</sup>. PowerLab and LabChart software (AD Instruments, UK) was  
123 used to record all data. Blood flow is presented in absolute units (ml min<sup>-1</sup>) and normalized to  
124 mean carotid pressure (vascular conductance: ml min<sup>-1</sup> mm Hg<sup>-1</sup>).

125  
126 EDL fatigue resistance and tetanic force were also quantified. Fatigue resistance was  
127 determined as the ratio of end-stimulation: peak isometric twitch force, as quantified over the  
128 course of a 3 min period of continuous 10 Hz stimulation. An average of 5 consecutive twitches  
129 was calculated for peak and end-stimulation forces. Following restoration of pre-fatigue resting  
130 blood flow (~10 min recovery), tetanic forces were quantified by 200 Hz stimulation (200 ms  
131 duration). Data is presented in absolute units (g) and normalized to wet muscle mass (g/mg  
132 EDL).

### 133 134 ***In vitro* soleus functional assessment**

135 Left soleus were dissected to allow *in vitro* contractile function to be assessed using a length-  
136 controlled lever system (305C, Aurora Scientific, Aurora, Canada), as previously described<sup>13</sup>.  
137 Muscles were prepared in a Krebs–Henseleit solution (117 NaCl, 4.7 KCl, 1.2 MgSO<sub>4</sub>, 1.2  
138 KH<sub>2</sub>PO<sub>4</sub>, 24.8 NaHCO<sub>3</sub>, 2.5 CaCl<sub>2</sub>, 11.1 glucose; in mmol l<sup>-1</sup>) at 4°C equilibrated with 95%  
139 O<sub>2</sub>/5% CO<sub>2</sub>. A muscle bundle was then mounted vertically in a buffer-filled organ bath (Krebs–  
140 Henseleit solution), set at optimal length ( $L_0$ ), and after 15 min at ~21°C was stimulated  
141 according to two distinct protocols: i) isometric force-frequency, and ii) isotonic force-velocity.  
142 The force-frequency relationship was determined in response to stimulation at 1, 15, 30, 50,  
143 80, 120 and 150 Hz, with 1 min of recovery between contractions. After a 5 min period during  
144 which muscle length was measured using digital calipers, the force-velocity relationship was  
145 determined via isotonic contractions (80-10% of the maximal tetanic force; each separated by  
146 1 min) at 150 Hz for 300 ms. Shortening velocity ( $L_0/s$ ) was determined 10 ms after the first

147 change in length and on the linear section of the transient (605A DMA software, Aurora  
148 Scientific). Force (N) was normalized to muscle cross-sectional area (CSA; cm<sup>2</sup>) by dividing  
149 muscle mass (g) by the product of  $L_o$  (cm) and estimated muscle density (1.06 g/cm<sup>3</sup>), which  
150 allowed specific force in N/cm<sup>2</sup> to be calculated.

151

### 152 **Mitochondrial respiration**

153 *In situ* mitochondrial respiration ( $JO_2$ ) was assessed in permeabilized EDL muscle fibers using  
154 high resolution respirometry (Oxygraph-2k; Oroboros Instruments, Innsbruck, Austria), as  
155 described elsewhere<sup>16</sup>. Samples were dissected in BIOPS solution, permeabilized in saponin  
156 (50 µg/ml) for 30 min, washed (twice) in MIR06 for 10 min, weighed and immediately  
157 transferred to the chambers of the high-resolution respirometer, where each chamber  
158 contained 2 mL of MiR05 at 37°C. Chambers were oxygenated (~450 nmol·mL<sup>-1</sup>) before  
159 starting the experiments. A standard protocol<sup>16, 17</sup> for substrate, uncoupler, and inhibitor  
160 titration (SUIT) was then used for measuring leak respiration with complex I substrates ( $L_I$ )  
161 and oxidative phosphorylation with complex I ( $P_I$ ) and complex I+II substrates ( $P_{I+II}$ ) as well as  
162 uncoupled respiration in the presence of complex I+II ( $E_{I+II}$ ) and complex II substrates ( $E_{II}$ ).  
163 Substrates were injected in the following order: blebbistain (2 µL), glutamate (10 µL), malate  
164 (2.5 µL), pyruvate (5 µL), ADP (10 µL), cytochrome c (5 µL), succinate (20 µL), FCCP (1 µL),  
165 rotenone (5 µL), antimycin A (5 µL), ascorbate (5 µL), TMPD (5 µL) and sodium azide (10 µL).  
166 Cytochrome c was added to evaluate the integrity of the mitochondrial outer membrane  
167 (samples with a >15% increase in respiration rate were excluded) and intrinsic function was  
168 assessed following normalization to mitochondrial content (complex IV activity;  $C_{IV}$ ) in addition  
169 to the coupling efficiency (i.e., respiratory control ratio, RCR: complex I phosphorylated  
170 state/complex I leak respiration).

171

### 172 **Histological analysis**

173 Skeletal muscles were mounted in optimal cutting temperature embedding medium (Thermo  
174 Scientific, Loughborough, UK), frozen in liquid nitrogen-cooled isopentane and stored at -  
175 80°C. Muscle samples were cryosectioned (-20°C, 10 µm), mounted on polylysine-coated  
176 slides and stored at -20°C until staining. Muscle fiber type composition and capillary network  
177 morphology were determined as previously described<sup>13</sup>. Briefly, sections were fixed for 2 min  
178 in 2% paraformaldehyde, washed in phosphate-buffered saline (PBS; P4417, Sigma-Aldrich,  
179 St Louis, MO) and blocked for 10 min in 1% bovine serum albumin (A6003, Sigma-Aldrich, St  
180 Louis, MO). Myofiber boundaries were labelled with a rabbit anti-laminin antibody (1:200;  
181 L9393, Sigma-Aldrich, St Louis, MO), while monoclonal myosin heavy chain antibodies BA-  
182 D5 (IgG2B, 1:1000) and SC-71 (IgG1, 1:500) were used to label Type I (oxidative) and Type  
183 IIa (fast oxidative, glycolytic) fibers, respectively (Developmental Studies Hybridoma Bank,  
184 Iowa City, IA, USA). Unstained fibers were quantified as Type IIb/IIx. After washing in PBS,  
185 sections were incubated for 60 min with secondary antibodies Alexa Fluor 555 (conjugated  
186 goat anti-mouse IgG, 1:1000, A-21422, Thermo Fisher Scientific, Waltham, MA) and Alexa  
187 Fluor 488 (conjugated rabbit anti-mouse IgG, 1:1000, A11059, Thermo Fisher Scientific,  
188 Waltham, MA). Finally, capillaries were labelled with fluorescein-conjugated *Griffonia*  
189 *simplicifolia* lectin I (Vector Labs, Peterborough, UK; FL-1101), a carbohydrate-binding protein  
190 (lectin) specific to rodent endothelial cells. Slides were imaged at x10 magnification using a  
191 Nikon Eclipse E600 (Nikon, Tokyo, Japan) optical microscope attached to a digital camera  
192 (QIMAGING, MicroPublisher 5.0 RTV, Surrey, BC, Canada). Fiber type-specific cross-  
193 sectional area (FCSA), capillary-to-fiber ratio (C:F), capillary density (CD), capillary domain  
194 area (CDA), local capillary-to-fiber ratio (LCFR), and local capillary density (LCD) were derived  
195 from histological sections using DTect software in MATLAB (The MathWorks, Cambridge,  
196 United Kingdom)<sup>18</sup>. Two regions of interest (~155 fibers) were taken at the core of the sections  
197 to establish an unbiased counting frame, taking into account the regional heterogeneity across  
198 muscles<sup>13</sup>.

199

200 To investigate the functional consequence of the capillary network morphology we  
201 mathematically modelled skeletal muscle oxygen transport kinetics using a custom MATLAB

202 oxygen transport modeler (OTM), as described in more detail in our previous studies<sup>13, 18</sup>.  
203 Using digitized images of EDL muscle cryosections, the OTM incorporates fiber type-specific  
204 features (i.e., FCSA, fiber type distribution and capillary locations) and estimates of capillary  
205 radius ( $1.8\text{-}2.5 \times 10^{-4}$  cm), muscle oxygen consumption ( $15.7 \times 10^{-5}$  ml O<sub>2</sub> ml<sup>-1</sup> s<sup>-1</sup>), myoglobin  
206 concentration ( $10.2 \times 10^{-3}$  ml O<sub>2</sub> ml<sup>-1</sup>), O<sub>2</sub> solubility ( $3.89 \times 10^{-5}$  ml O<sub>2</sub> ml<sup>-1</sup> mmHg<sup>-1</sup>) and  
207 diffusivity ( $1.73 \times 10^{-7}$  cm<sup>2</sup> s<sup>-1</sup>) to model local oxygen consumption and estimate tissue oxygen  
208 partial pressure (PO<sub>2</sub>) distribution.

209  
210 To characterize muscle fibrosis, soleus and EDL cryosections were stained with Sirius red  
211 (Sigma-Aldrich, St Louis, MO, USA). Briefly, sections (10 μm thickness) were hydrated with  
212 distilled water, incubated with Picro-Sirius Red (1 h), rinsed in acetic acid solution (0.5%), and  
213 dehydrated in absolute alcohol. The relative area of the sections occupied by Sirius red  
214 staining was then calculated using ImageJ software. A similar approach was also used to  
215 characterize cardiac remodeling in rats treated with or without caloric restriction, with left and  
216 right ventricular thickness subsequently determined.

217  
218 EDL cryosections (10 μm thickness) were stained with DAPI to quantify the number of nuclei  
219 per fiber. Sections were fixed for 2 minutes in 2% paraformaldehyde, washed in PBS (P4417,  
220 Sigma-Aldrich, St Louis, MO) and blocked for 10 minutes in 1% BSA (A6003, Sigma-Aldrich,  
221 St Louis, MO). Muscle fiber boundaries were labelled with a rabbit anti-laminin antibody  
222 (1:200; L9393, Sigma-Aldrich, St Louis, MO). Sections were then incubated for 60 min with  
223 Alexa Fluor 488 (conjugated rabbit anti-mouse IgG, 1:1000, A11059, Thermo Fisher Scientific,  
224 Waltham, MA) and mounted in slides using mounting medium with DAPI. Three washes with  
225 PBS were performed between each step. Myonuclei and fibers were manually counted in  
226 images using ImageJ software. A myonucleus was defined if it met one of the following criteria:  
227 1) it was clearly located within the myofiber boundary; 2) it was on the boundary facing inside  
228 the fiber; or 3) >50% of the area fell inside the fiber boundary<sup>19</sup>.

### 229 230 **Protein extraction and western blot analysis**

231 Frozen muscle samples were homogenized in RIPA buffer (50 mM Tris, 150 mM sodium  
232 chloride, 1 mM EDTA, 1% NP-40, 0.25% sodium-deoxycholate, 0.1% SDS, 1% Triton X-100;  
233 pH 7.4) containing a protease and phosphatase inhibitor cocktail (Thermo Scientific A32961),  
234 sonicated, and centrifuged at 13,000 rpm for 10 min. The supernatant was collected, and  
235 protein content was quantified *via* BCA assay (Thermo Scientific 23225). Muscle  
236 homogenates with equal amounts of protein (20 μg) were mixed with loading buffer (126  
237 mmol/L Tris-HCl, 20% glycerol, 4% SDS, 1.0% 2-mercaptoethanol, 0.005% bromophenol  
238 blue; pH 6.8), and separated by electrophoresis (1.5 hours at 90 V) on 8%-12% sodium  
239 dodecyl sulfate polyacrylamide gels and transferred to a nitrocellulose membrane  
240 (Amersham™ Protran® GE10600003). Membranes were stained with Ponceau S to  
241 determine total protein content and rinsed with Tris-buffered saline/Tween solution (0.5 M  
242 NaCl; 50 mM Tris-HCl, pH 7.4; and 0.1% Tween 20). Membranes were then blocked with 5%  
243 milk or 5% BSA, and incubated overnight at 4°C with primary antibodies (see Supplementary  
244 Table 2). After a 5-min wash (3x) in Tris-buffered saline/Tween solution, membranes were  
245 incubated with secondary antibodies (Supplementary Table 2) for 1 h at room temperature.  
246 Membranes were again washed for 5 min (3x) in Tris-buffered saline/Tween solution, and  
247 labelled proteins were detected using an enhanced chemiluminescence system (iBright750,  
248 Invitrogen by Thermo Fisher Scientific CL750) and densitometry quantified using ImageJ  
249 software (Scion Corp., National Institutes of Health, Bethesda, MD, USA). Protein expression  
250 was normalized to total protein content (Ponceau S) and presented as fold change to unloaded  
251 muscle from controls.

### 252 253 **Puromycin assay**

254 The SUnSET method was used to measure protein synthesis<sup>20</sup>. Briefly, 30 min prior to  
255 euthanasia animals received an i.p. injection of puromycin (0.040 μmol/g body mass;

256 dissolved in PBS), which was then detected in homogenized muscle samples via Western  
257 blotting, as described previously<sup>20</sup>.

258

### 259 **RNA isolation and real-time PCR**

260 RNA extraction of the EDL was performed using the Trizol-chloroform-isopropanol method  
261 following Trizol reagent solution user guide (Thermo Fisher Scientific, Cat No. AM9738).  
262 Briefly, approximately 10 mg of tissue was homogenized in a tissue lyser (Qiagen TissueLyser  
263 II, Cat No. 85300) with 1 ml Trizol reagent solution and a glass bead. Subsequently, 200  $\mu$ l  
264 chloroform was added, shaken and incubated at room temperature for 5 minutes and  
265 centrifuged (12,000rpm, 4°C, 15 minutes) to separate the RNA containing phase. The RNA  
266 containing phase was combined with 500  $\mu$ l isopropanol, vortexed and left to incubate at room  
267 temperature for 10 minutes and then centrifuged to produce an RNA pellet (12,000rpm, 4°C,  
268 15 minutes). The Pellet was then washed twice in 75% ethanol, centrifuged (12,000rpm, 4°C,  
269 5 minutes) and left to dry for 1 hour. Once dried 30  $\mu$ l of RNase/DNase free water was added  
270 to the pellet. RNA purification using the RNA clean and concentrate-5 kit was conducted  
271 following the kit protocol (Zymo Research, Cat No. R1013) resulting in high quality RNA in 20  
272  $\mu$ l of RNase free water confirmed using a nanodrop. cDNA synthesis was conducted using the  
273 RT<sup>2</sup> First Strand kit (Qiagen, Cat No. 330404) following kit protocols. PCR was performed  
274 using SYBR green Light Cycler 480 I master mix (Roche, Cat No. 04887352001), and a Bio-  
275 Rad CFX 96 Thermocycler. Genes were run in triplicate for each sample using lab validated  
276 primers containing both forward and reverse primers (Supplementary Table 2). Delta-Delta-  
277 CT method was then performed to calculate fold expression changes normalized to beta actin.

278

### 279 **RNA sequencing**

280 Total RNA was extracted using the phenol-chloroform extraction method. There were three  
281 conditions; control, HFpEF, and HFpEF+CR with four biological replicates from each leg (left  
282 and right). Novogene, Cambridge, United Kingdom, performed RNA sequencing (RNA-seq).  
283 The library preparation was constructed using the TruSeq Stranded mRNA kit (Illumina),  
284 following the manufacturer's recommended protocol. The libraries were sequenced on the  
285 HiSeq 4000 platform with 150 bp paired-end strategy. On average, 84.59 M high-quality reads  
286 were generated from the RNA sequencing project. The 24 raw reads were uploaded to the  
287 ENA-EMBL-EBI database under the accession number E-MTAB-12494.

288

### 289 **RNA sequencing data analysis**

290 STAR aligner<sup>21</sup> was used to map the raw reads to the *Rattus norvegicus* reference genome  
291 (Ensembl mRatBN7.2). The gene expression levels were quantified by featureCounts<sup>21,22</sup> and  
292 normalized by DESeq2<sup>23</sup> using the negative binomial model. Differentially expressed genes  
293 were defined based on adjusted p-value < 0.05. For pathway enrichment analyses, Kyoto  
294 Encyclopedia of Genes and Genomes (KEGG) and REACTOME databases were searched  
295 via clusterProfiler and ReactomePA, respectively, to predict potential enriched pathways. The  
296 significant terms were selected based on adjusted p-value < 0.05. The adjusted p-value was  
297 corrected based on Benjamini and Hochberg method. Volcano and dot plots were generated  
298 using the GGPlot2 function in R Statistical Software (v4.3.0; R Core Team 2022)<sup>24</sup>.

299

### 300 **Human experiments**

301 For human studies, age-matched healthy controls (n=10) and patients with diagnosed HFpEF  
302 (n=10) were included. Clinical characteristics of these patients have been previously  
303 published<sup>1</sup>, however due to limited muscle tissue availability a smaller sample size is  
304 presented in this study. In brief, a *vastus lateralis* muscle sample was excised under local  
305 anesthesia via a percutaneous needle, as detailed elsewhere<sup>1</sup>. The tissue sample was  
306 cleaned free of connective tissue and immediately snap frozen in liquid nitrogen for  
307 subsequent western blotting as described above, although protein expression was normalized  
308 to loading control GAPDH.

309

310 **Supplemental Tables**

311

312 **Supplemental Table 1:** Human characteristics from age-matched healthy people  
 313 compared to patients with HFpEF

314

|                                       | <b>Healthy (n=10)</b> | <b>HFpEF (n=10)</b> | <b>p-value</b>   |
|---------------------------------------|-----------------------|---------------------|------------------|
| <b>Age [years]</b>                    | 68.9 ± 2.3            | 72.4 ± 1.2          | 0.12             |
| <b>Female gender [n] (%)</b>          | 7 (70.0)              | 8 (80.0)            | 0.95             |
| <b>BMI [kg/m<sup>2</sup>]</b>         | 29.0 ± 1.1            | 31.7 ± 1.8          | 0.22             |
| <b>Systolic blood pressure [mmHg]</b> | 133.0 ± 1.7           | 136.1 ± 2.8         | 0.45             |
| <b>NT-proBNP [pg/ml]</b>              | 74 ± 2                | 1072 ± 329          | <b>&lt;0.001</b> |
| <b>LVEF [%]</b>                       | 65.1 ± 2.1            | 61.6 ± 1.9          | 0.44             |
| <b>E/e' septal</b>                    | 8.27 ± 0.9            | 17.3 ± 2.3          | <b>&lt;0.001</b> |
| <b>E/e' lateral</b>                   | 6.30 ± 0.4            | 11.4 ± 1.1          | <b>&lt;0.001</b> |

315

316 Data are presented as mean±SD

317

318

319

320

**Supplemental Table 2.** List of antibodies

| <b>Primary antibodies</b>                 | <b>Dilution</b> | <b>Company</b>            |
|-------------------------------------------|-----------------|---------------------------|
| 4EBP1                                     | 1:1000          | Cell Signaling Technology |
| p-4EBP1                                   | 1:1000          | Cell Signaling Technology |
| S6                                        | 1:1000          | Cell Signaling Technology |
| p-S6                                      | 1:1000          | Cell Signaling Technology |
| AMPK                                      | 1:1000          | Cell Signaling Technology |
| p-AMPK                                    | 1:1000          | Cell Signaling Technology |
| Drp1                                      | 1:1000          | Cell Signaling Technology |
| p-Drp1                                    | 1:1000          | Cell Signaling Technology |
| ACC                                       | 1:1000          | Cell Signaling Technology |
| p-ACC                                     | 1:1000          | Cell Signaling Technology |
| ACL                                       | 1:1000          | Cell Signaling Technology |
| p-ACL                                     | 1:1000          | Cell Signaling Technology |
| p62                                       | 1:1000          | Cell Signaling Technology |
| MuRF1                                     | 1:1000          | Santa Cruz Biotechnology  |
| PGC-1 $\alpha$                            | 1:1000          | GeneTex                   |
| OPA1                                      | 1:1000          | Sigma-Aldrich             |
| Puromycin                                 | 1:500           | Sigma-Aldrich             |
| Anti-Laminin                              | 5:1000          | Sigma-Aldrich             |
| BA-D5                                     | 1:500           | DSHB, University of Iowa  |
| SC-71                                     | 1:500           | DSHB, University of Iowa  |
| <b>Secondary antibodies</b>               | <b>Dilution</b> | <b>Company</b>            |
| Anti-mouse IgG                            | 1:2500          | Cell Signaling Technology |
| Goat anti-mouse IgG2a                     | 1:2500          | Cell Signaling Technology |
| Anti-rabbit IgG                           | 1:2500          | Cell Signaling Technology |
| Rabbit anti-Mouse IgG,<br>Alexa Fluor 488 | 1:1000          | Thermo Fisher Scientific  |
| Goat anti-Mouse IgG,<br>Alexa Fluor 555   | 1:1000          | Thermo Fisher Scientific  |

322  
323  
324  
325  
326  
327  
328  
329  
330



**Supplemental Table 3. RT-qPCR primers**

| Gene       | Gene accession no.       | Reference position       |
|------------|--------------------------|--------------------------|
| Beta-actin | NM_031144.3              | 1039                     |
| IGF-1      | NM_178866.4              | 365                      |
| Myomaker   | NM_001134517.1           | 1245                     |
| MyoD       | NM_176079.1              | 1068                     |
| Myogenin   | NM_017115.2              | 640                      |
| Myostatin  | NM_019151.1              | 789                      |
| MuRF1      | NM_080903.1              | 808                      |
| MAFbx      | NM_133521.1              | 842                      |
| Myf5       | NM_001106783.1           | 163                      |
| Pax7       | NM_001191984.1           | 211                      |
| Ptch1      | NM_053566.1              | 4213                     |
| Gli2       | NM_001107169.1           | 2352                     |
| Aplnr      | NM_031349.2              | 748                      |
| Apln       | NM_031612.3              | 551                      |
| Other      | Forward primer           | Reverse primer           |
| Piezo 1    | CAC AAA GTA<br>CCG GGC G | AAA GTA GCA<br>CTT GAC G |

331  
332  
333  
334

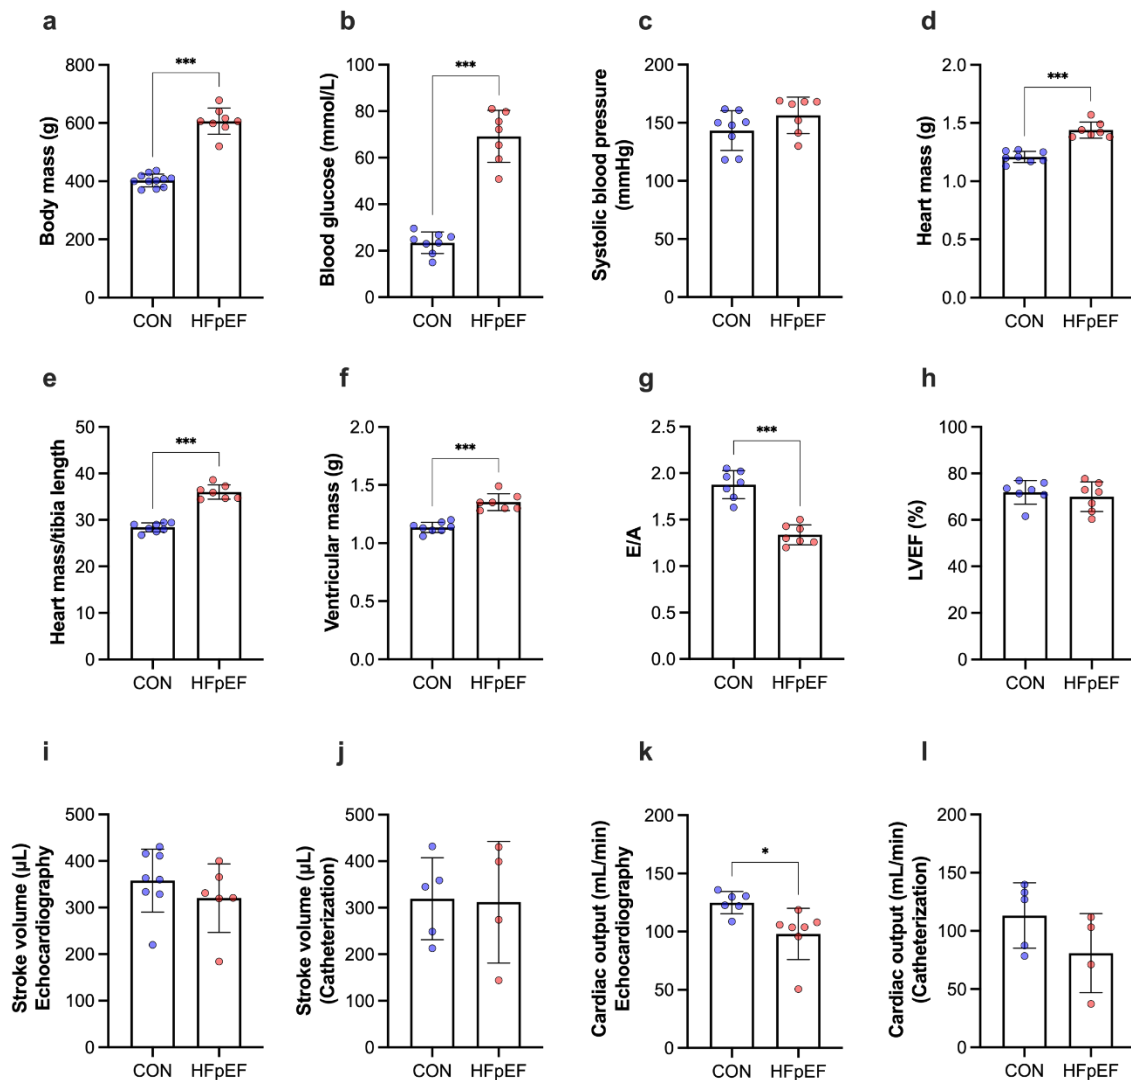

337

338

339

340

341

342

343

344

345

346

347

348

349

350

351

**Supplemental Fig. 1 Cardiometabolic phenotype in HFpEF.** Metabolic features including **a** body mass (CON n = 11, HFpEF n = 8), **b** blood glucose (CON n = 8, HFpEF n = 7) and **c** systolic blood pressure (CON n = 8, HFpEF n = 7). **d** Heart mass (CON n = 8, HFpEF n = 7), **e** heart mass normalized to tibia length (CON n = 8, HFpEF n = 7) and **f** ventricular mass after removing the atria (CON n = 8, HFpEF n = 7). Echocardiographic measurements of **g** early (E wave) and late (A wave) ventricular filling velocities (CON n = 7, HFpEF n = 7), **h** left ventricular ejection fraction (LVEF) (CON n = 7, HFpEF n = 7), **i** stroke volume (CON n = 8, HFpEF n = 6) and **k** cardiac output (CON n = 6, HFpEF n = 7). Invasive hemodynamic measurements of **j** stroke volume (CON n = 5, HFpEF n = 4) and **l** cardiac output (CON n = 5, HFpEF n = 4). Differences between groups were analyzed by unpaired two-tailed Student t-tests. Data are presented as mean ± SD, and the level of significance was accepted as \* P < 0.05, \*\* P < 0.01, \*\*\* P < 0.001 for all analyses.

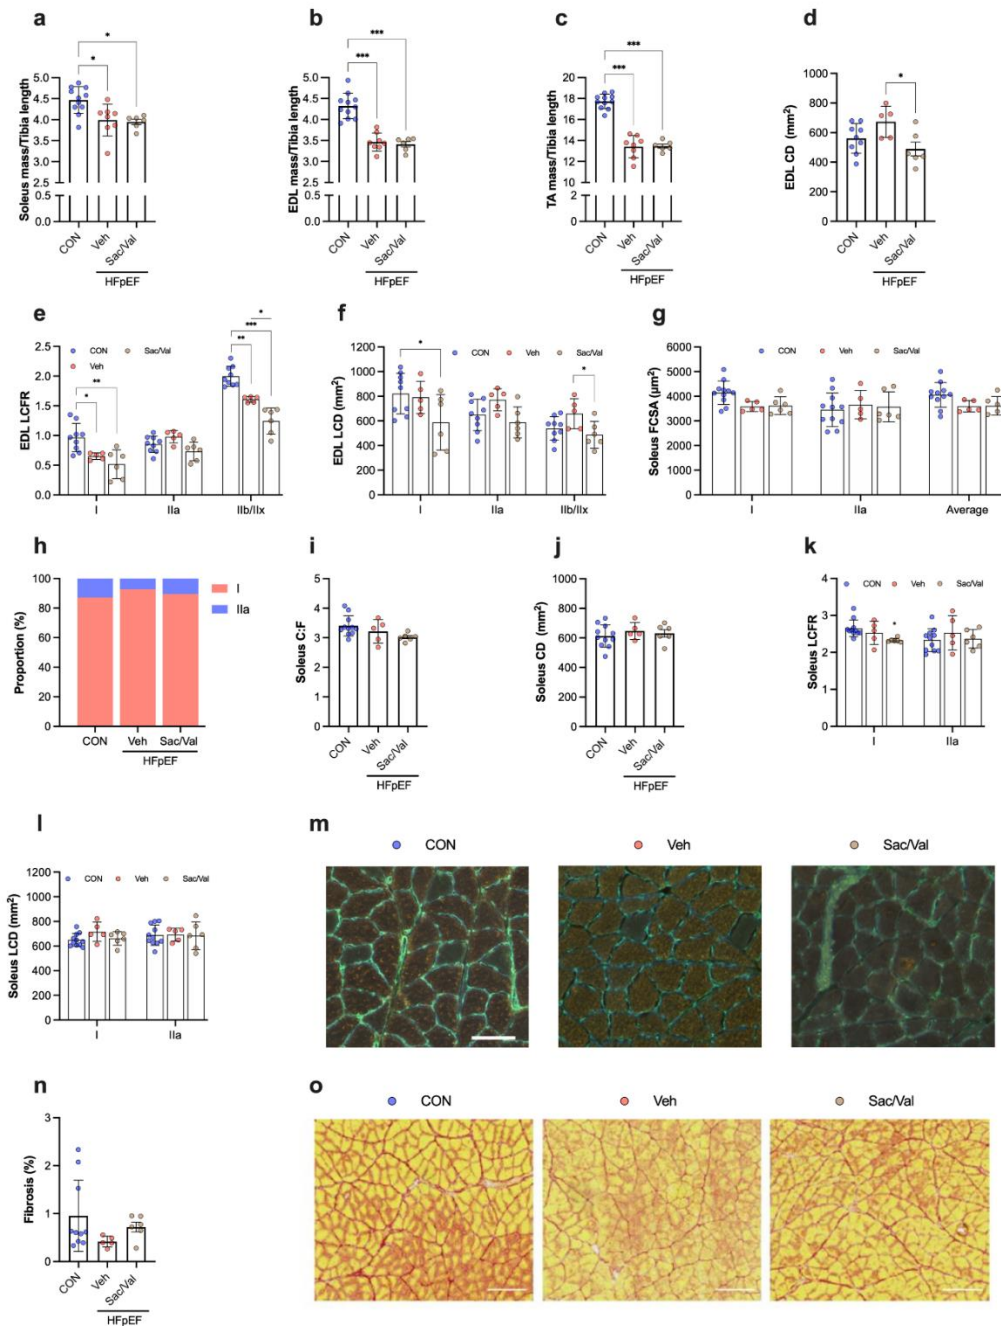

352  
353

354 **Supplemental Fig. 2 Skeletal muscle morphology in HFpEF.** **a** Soleus, **b** EDL and **c** TA  
 355 mass normalized to tibia length (CON n = 11, HFpEF+Veh n = 8, HFpEF+Sac/Val n = 6). **d**  
 356 EDL capillary density (CD) (CON n = 9, HFpEF+Veh n = 5, HFpEF+Sac/Val n = 6). EDL **e**  
 357 local capillary-to-fiber ratio (LCFR) and **f** local capillary density (LCD) (CON n = 9, HFpEF+Veh  
 358 n = 5, HFpEF+Sac/Val n = 6). Global and fiber-type-specific histological features of the soleus  
 359 muscle including **g** fiber cross-sectional area (FCSA), **h** fiber type distribution, **i** capillary-to-  
 360 fiber ratio (C:F), **j** CD, **k** LCFR and **l** LCD (CON n = 11, HFpEF+Veh n = 5, HFpEF+Sac/Val n  
 361 = 6). **m** Representative images of soleus cryosections stained for Type I (red) and Type IIa  
 362 (green) fibers and capillaries (green). **n** Percentage of muscle fibrosis (CON n = 10,  
 363 HFpEF+Veh n = 5, HFpEF+Sac/Val n = 6). **o** Representative images of soleus cryosections  
 364 stained with Sirius red (fibrotic tissue in red). Between-group differences were assessed by  
 365 one-way ANOVA followed by Bonferroni *post hoc* test. Data are presented as mean±SD, and  
 366 the level of significance was accepted as \* P < 0.05, \*\* P < 0.01, \*\*\* P < 0.001 for all analyses.

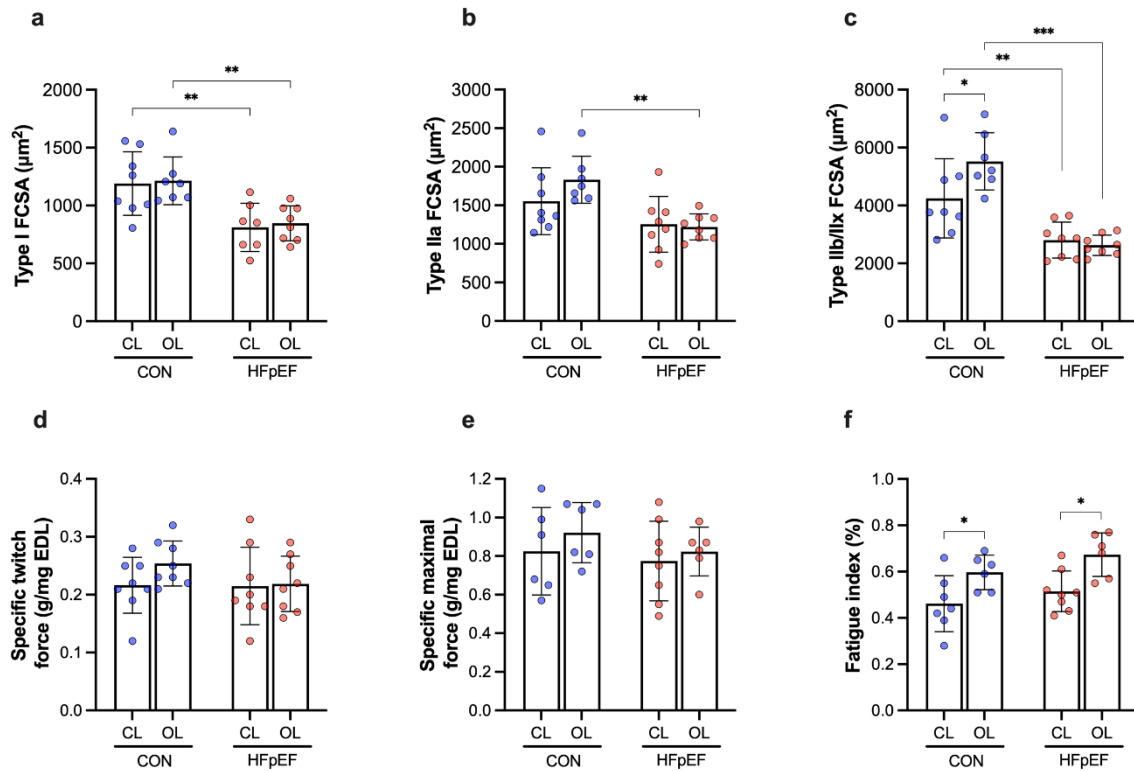

367  
368

369

370

371

372

373

374

375

376

377

378

379

380

381

382

383

**Supplemental Fig. 3 Overload-induced changes in skeletal muscle morphology and function in HFpEF rats.** **a** Type I fiber cross-sectional area (FCSA) (CL muscles: CON n = 8 and HFpEF n = 7; OL muscles: CON n = 7 and HFpEF n = 8), **b** Type IIa FCSA (CL muscles: CON n = 8 and HFpEF n = 8; OL muscles: CON n = 7 and HFpEF n = 8) and **c** Type IIb/IIx FCSA (CL muscles: CON n = 8 and HFpEF n = 8; OL muscles: CON n = 7 and HFpEF n = 8) of contralateral (CL) and overloaded (OL) EDL muscles of lean controls (CON) and obese-HFpEF rats. *In situ* functional measurements including for specific force during **d** twitch (CL muscles: CON n = 8 and HFpEF n = 8; OL muscles: CON n = 8 and HFpEF n = 8) and **e** maximal (CL muscles: CON n = 6 and HFpEF n = 8; OL muscles: CON n = 6 and HFpEF n = 6) and **f** fatigability (CL muscles: CON n = 7 and HFpEF n = 8; OL muscles: CON n = 6 and HFpEF n = 6). Differences were assessed by two-way ANOVA followed by Bonferroni *post-hoc* test. Data are presented as mean $\pm$ SD, and the level of significance was accepted as \* P < 0.05, \*\* P < 0.01, \*\*\* P < 0.001 for all analyses.

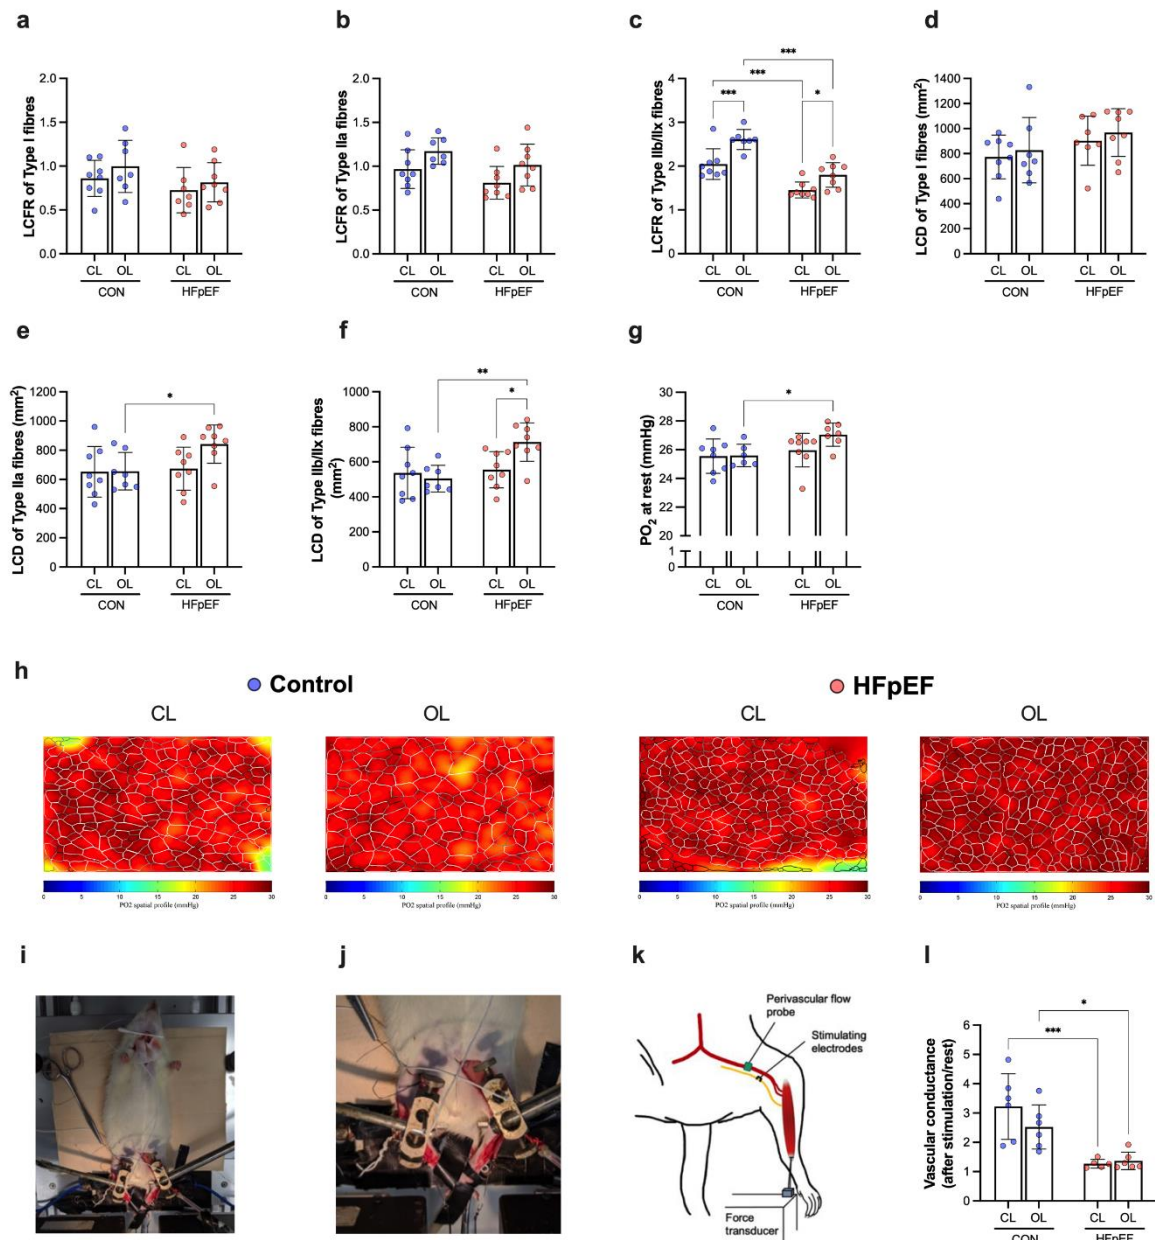

384  
 385  
 386  
 387  
 388  
 389  
 390  
 391  
 392  
 393  
 394  
 395  
 396  
 397  
 398  
 399  
 400  
 401

**Supplemental Fig. 4 Blood flow and capillary network morphology.** Local capillary-to-fiber ratio of **a** Type I (CL muscles: CON n = 8 and HFpEF n = 8; OL muscles: CON n = 7 and HFpEF n = 8), **b** Type IIa (CL muscles: CON n = 8 and HFpEF n = 8; OL muscles: CON n = 7 and HFpEF n = 8) and **c** Type IIb/IIx fibers (CL muscles: CON n = 8 and HFpEF n = 8; OL muscles: CON n = 7 and HFpEF n = 8) in contralateral (CL) and overloaded (OL) EDL muscles of controls (CON) and HFpEF rats. Local capillary density (LCD) of **d** Type I (CL muscles: CON n = 8 and HFpEF n = 7; OL muscles: CON n = 7 and HFpEF n = 8), **e** Type IIa (CL muscles: CON n = 8 and HFpEF n = 8; OL muscles: CON n = 7 and HFpEF n = 8) and **f** Type IIb/IIx (CL muscles: CON n = 8 and HFpEF n = 8; OL muscles: CON n = 7 and HFpEF n = 8). **g** Simulation of muscle PO<sub>2</sub> at rest (CL muscles: CON n = 8 and HFpEF n = 8; OL muscles: CON n = 6 and HFpEF n = 7) in **h** representative PO<sub>2</sub> images. **i-l** Femoral artery set up and vascular conductance during active hyperemia (CL muscles: CON n = 6 and HFpEF n = 5; OL muscles: CON n = 6 and HFpEF n = 6). CL = contralateral muscle, OL = overloaded muscle. Differences were assessed by two-way ANOVA followed by Bonferroni *post-hoc* test. Data are presented as mean±SD, and the level of significance was accepted as \* P < 0.05, \*\* P < 0.01, \*\*\* P < 0.001 for all analyses.

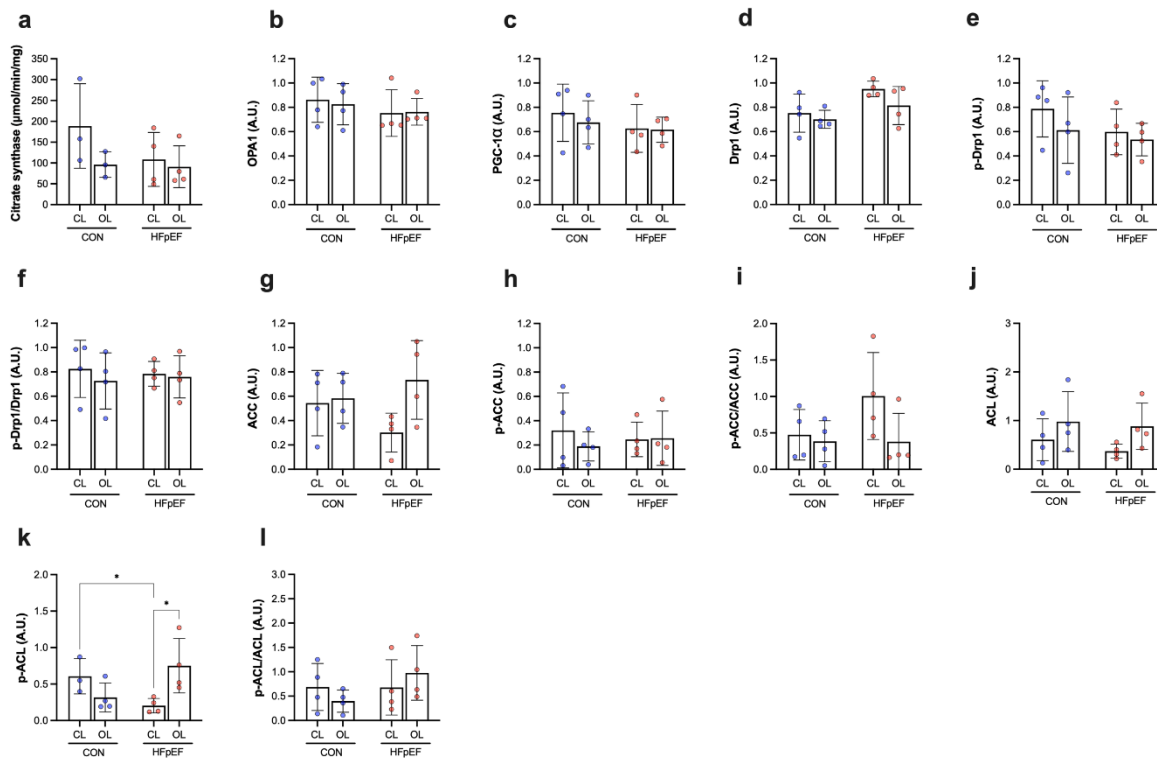

403  
 404  
 405  
 406  
 407  
 408  
 409  
 410  
 411  
 412  
 413

**Supplemental Fig. 5 Overload-induced changes in skeletal muscle mitochondrial proteins.** **a** Citrate synthase activity (CL and OL muscles: CON n = 3 and HFpEF n = 4). Protein expression (n=4 for CON and HFpEF for OL and CL muscles) of **b** OPA1, **c** PGC-1α, **d** Drp1, **e** phosphorylated (p)-Drp1, **f** pDrp1/Drp1 ratio, **g** ACC, **h** p-ACC, **i** p-ACC/ACC ratio, **j** ACL, **k** p-ACL and **l** p-ACL/ACL. Differences were assessed by two-way ANOVA followed by Bonferroni *post-hoc* test. Data are presented as mean±SD, and the level of significance was accepted as \* P < 0.05, \*\* P < 0.01, \*\*\* P < 0.001 for all analyses.

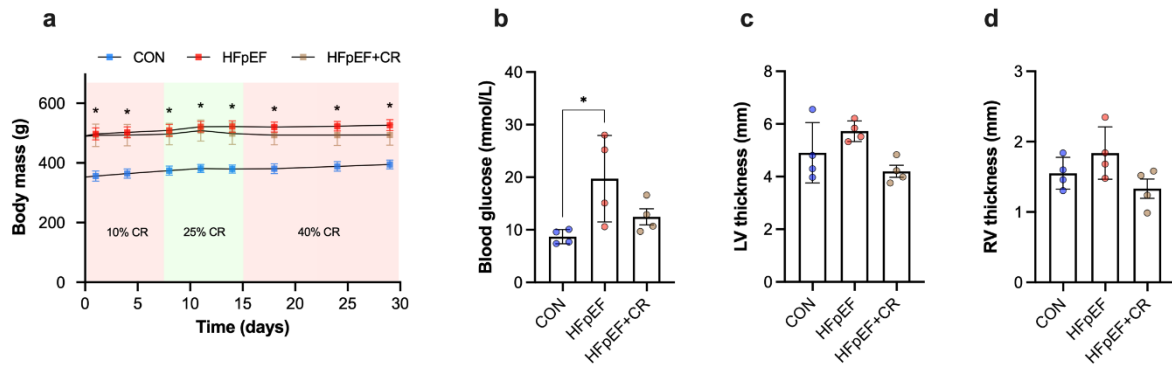

414  
 415  
 416  
 417  
 418  
 419  
 420  
 421  
 422  
 423

**Supplemental Fig. 6 Cardiometabolic phenotype in HFpEF following caloric restriction.**  
**a** body mass over time, measured every ~5 days (all n =4). **b** Blood glucose (all n =4). **c**  
 Histological analysis of left ventricular (LV) and **d** right ventricular (RV) thickness (all n =4).  
 Between-group differences were assessed by one-way ANOVA followed by Bonferroni *post-*  
*hoc* test. Data are presented as mean±SD, and the level of significance was accepted as \* P  
 < 0.05, \*\* P < 0.01, \*\*\* P < 0.001 for all analyses.

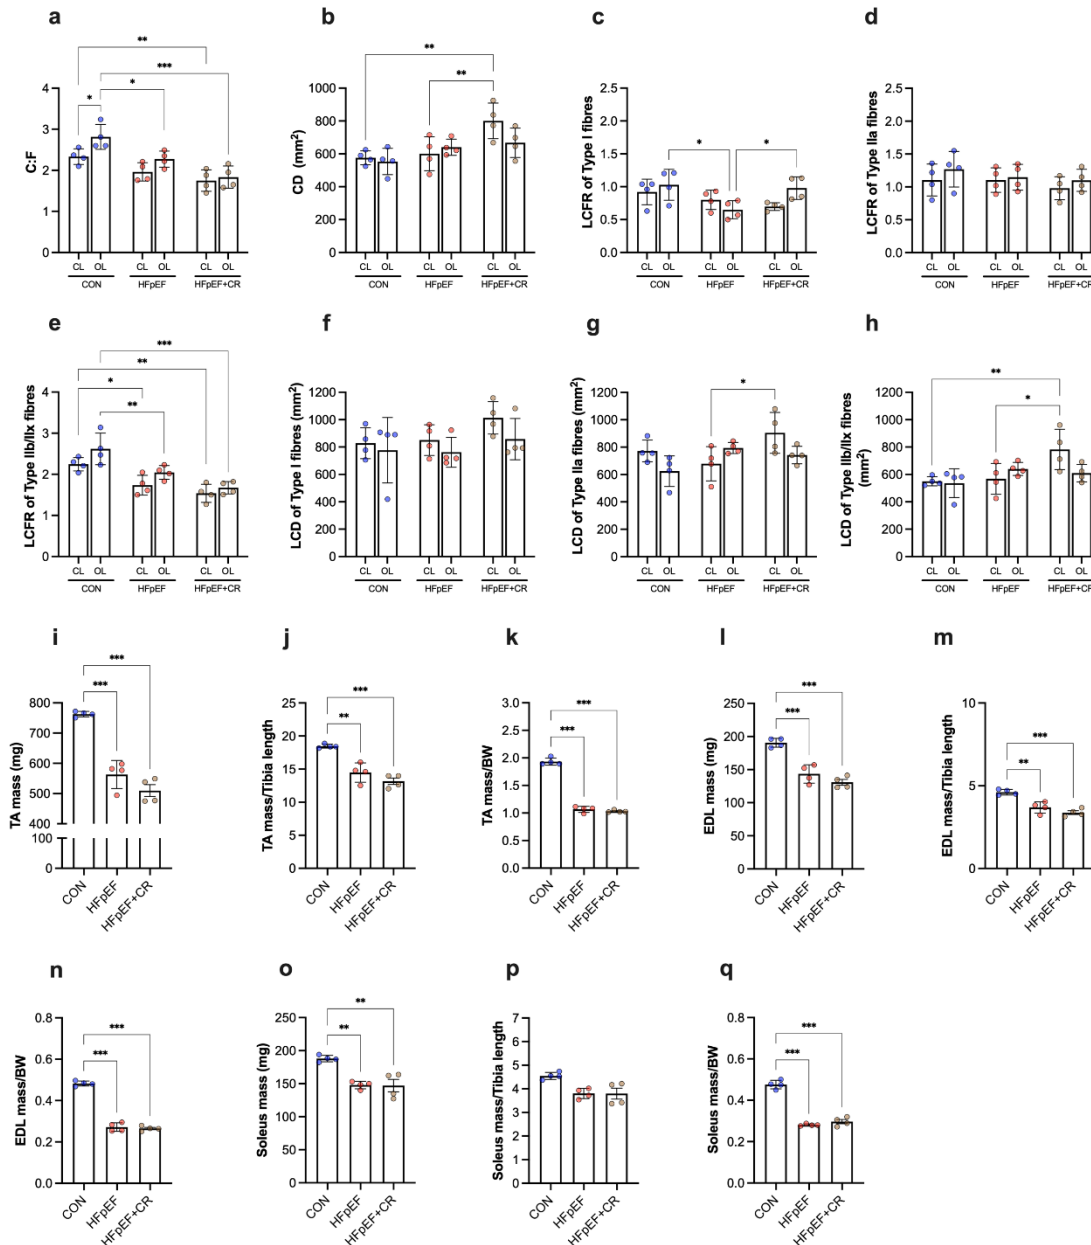

424

425

426

427

428

429

430

431

432

433

434

**Supplemental Fig. 7 Effects of caloric restriction on the skeletal muscle remodeling in HFpEF.** Global and fiber-type-specific histological features of the EDL muscle (overloaded (OL) and contralateral (CL) muscles) including **a** capillary-to-fiber (C:F) ratio (C:F), **b** capillary density (CD), local capillary-to-fiber ratio (LCFR) of **c** Type I, **d** Type IIa and **e** Type IIb/IIx fibers and local capillary density (LCD) of **f** Type I, **g** Type IIa and **h** Type IIb/IIx fibers (all n = 4). **i-k** TA, **l-n** EDL and **o-q** soleus mass, represented as total mass and normalized to tibia length and body weight (BW) (all n = 4/group). Differences were assessed by two-way ANOVA followed by Bonferroni *post-hoc* test. Between-group differences were assessed by one-way ANOVA followed by Bonferroni *post hoc* test. Data are presented as mean±SD, and the level of significance was accepted as \* P < 0.05, \*\* P < 0.01, \*\*\* P < 0.001 for all analyses.



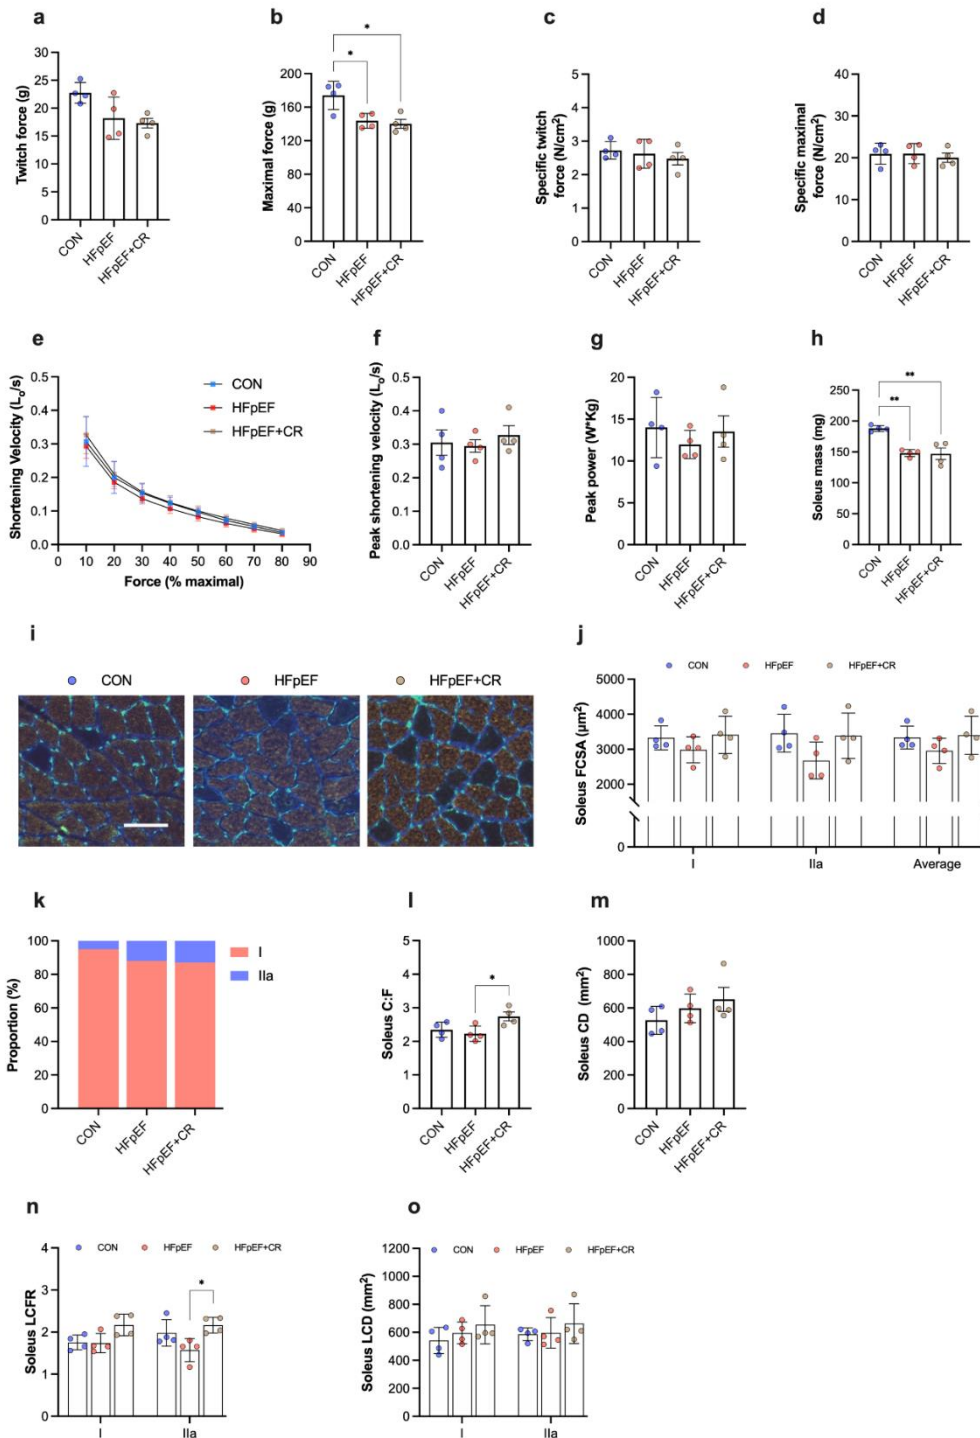

435  
436

437 **Supplemental Fig. 8 Effects of caloric restriction on soleus morphology and function in**  
 438 **HFpEF.** Absolute **a** twitch and **b** maximal forces. Specific **c** twitch and **d** maximal forces. **e**  
 439 Force-velocity curve. **f** Peak shortening velocity. **g** Peak power. **h** Muscle mass. **i**  
 440 Representative images of soleus cryosections stained for Type I (red) and Type IIa (dark  
 441 green) fibers and capillaries (bright green). **j** Fiber cross-sectional area (FCSA). **k** Fiber type  
 442 distribution. **l** Capillary-to-fiber ratio (C:F). **m** Capillary density (CD). **n** Local capillary-to-fiber  
 443 ratio (LCFR). **o** Local capillary density (LCD) (all n = 4). Between-group differences were  
 444 assessed by one-way ANOVA followed by Bonferroni *post-hoc* test. Data are presented as  
 445 mean±SD, and the level of significance was accepted as \* P < 0.05, \*\* P < 0.01, \*\*\* P < 0.001  
 446 for all analyses.

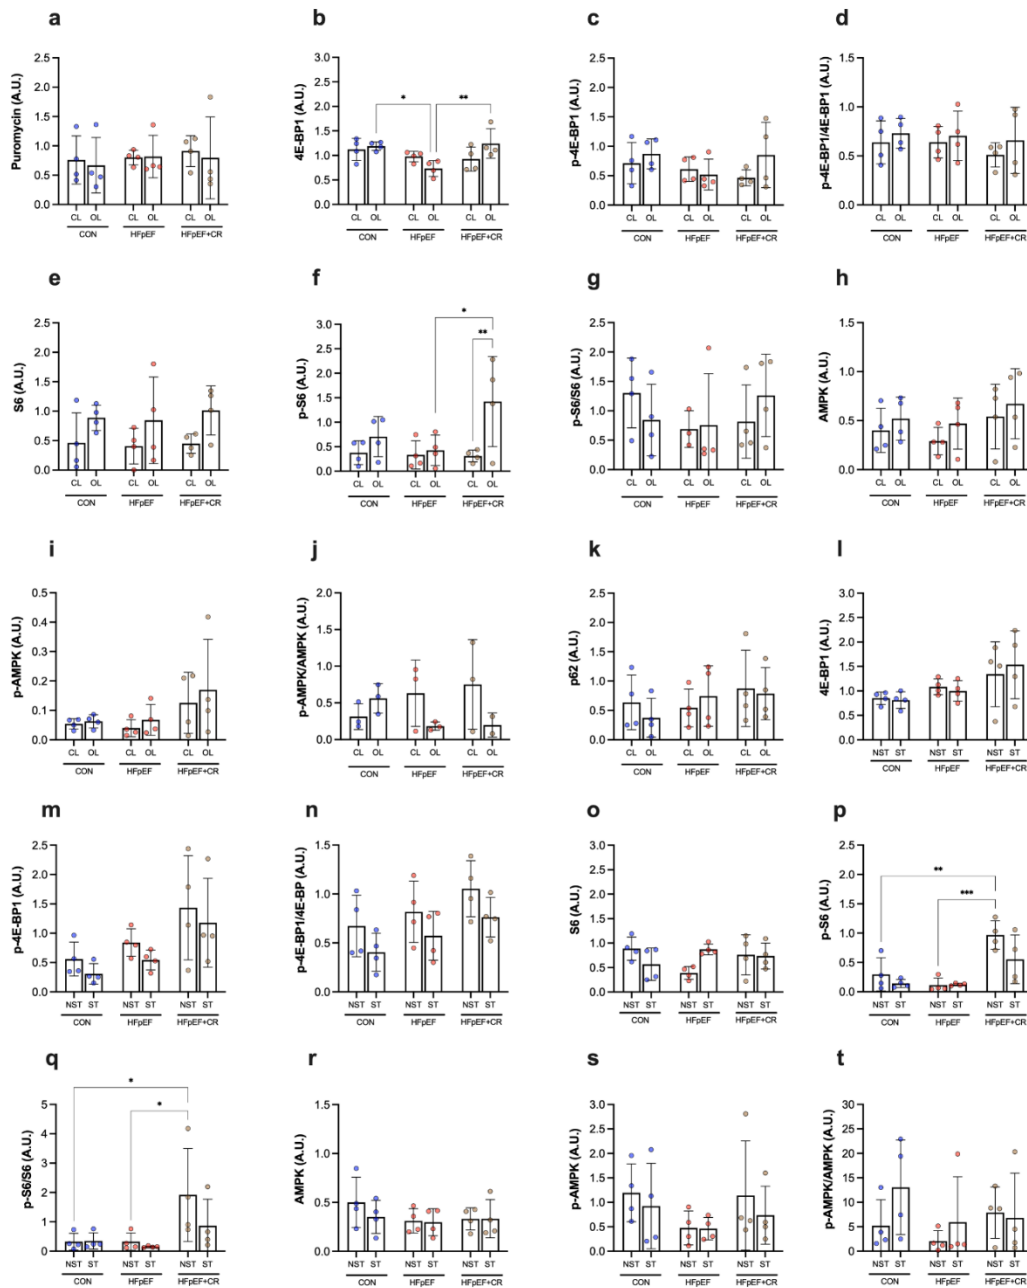

**Supplemental Fig. 9 Anabolic and catabolic signaling pathways.** Protein expression in contralateral (CL) and overloaded (OL) EDL muscles of **a** Puromycin as an index of global protein synthesis, **b** 4E-BP1, **c** phosphorylated (p)-4E-BP1, **d** p-4E-BP1/4E-BP1, **e** S6, **f** p-S6 (all n = 4), **g** p-S6/S6 (CL muscles: CON n = 4, HFpEF n = 3 and HFpEF+CR n = 4; OL muscles: CON n = 4, HFpEF n = 4 and HFpEF+CR n = 4), **h** AMPK, **i** p-AMPK (all n=4), **j** p-AMPK/AMPK (CL muscles: CON n = 3, HFpEF n = 3 and HFpEF+CR n = 3; OL muscles: CON n = 3, HFpEF n = 3 and HFpEF+CR n = 2) and **k** p62 (all n = 4). Protein expression in stimulated (ST) and non-stimulated (NST) soleus muscles of **l** 4E-BP1, **m** p-4E-BP1, **n** p-4E-BP1/4E-BP1, **o** S6, **p** p-S6, **q** p-S6/S6, **r** AMPK, **s** p-AMPK and **t** p-AMPK/AMPK (all n =4). Differences were assessed by two-way ANOVA followed by Bonferroni *post-hoc* test. Data are presented as mean±SD, and the level of significance was accepted as \* P < 0.05, \*\* P < 0.01, \*\*\* P < 0.001 for all analyses.

464  
465  
466

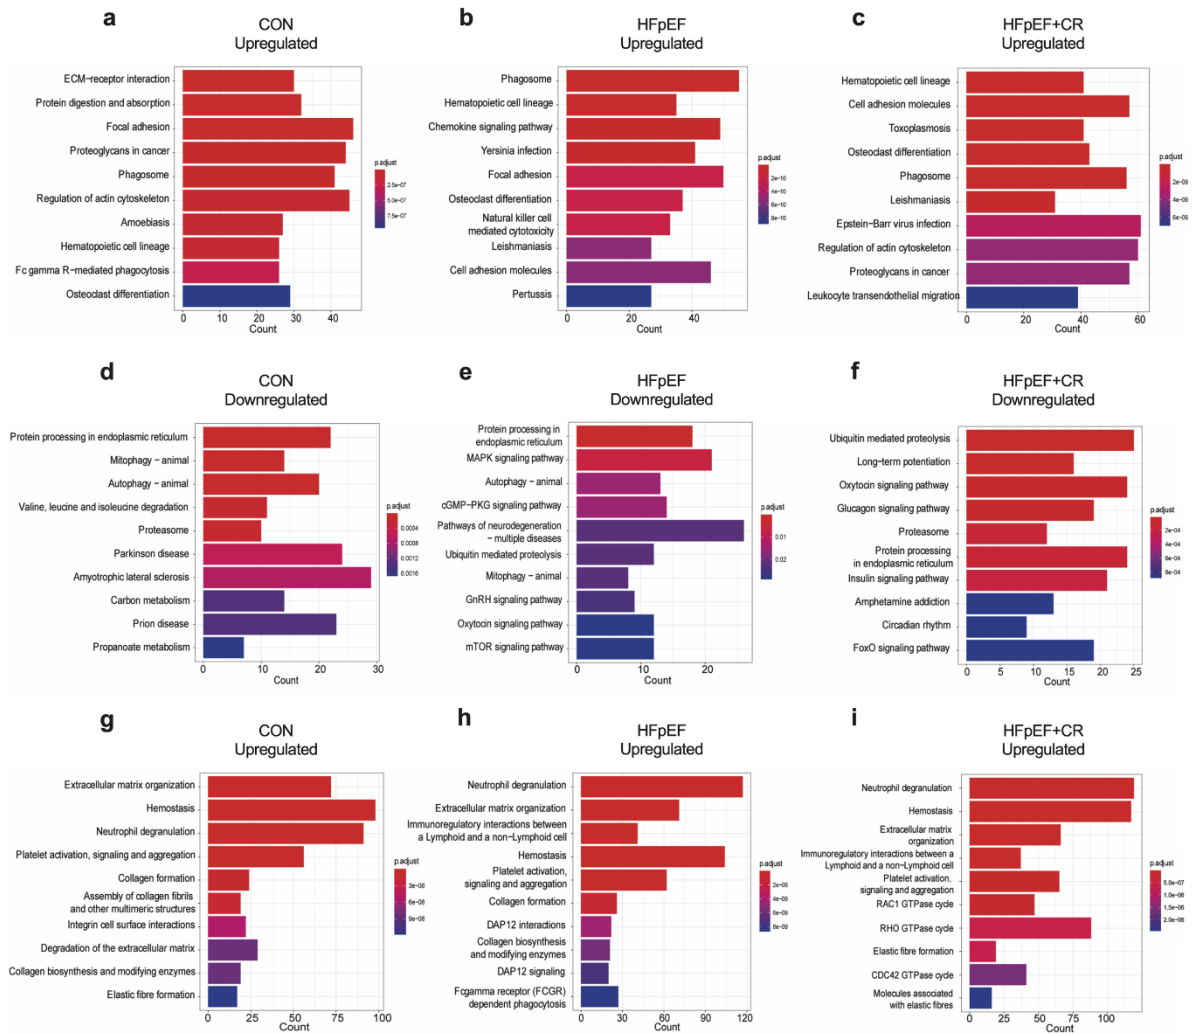

467  
468  
469  
470  
471  
472  
473  
474  
475  
476  
477  
478  
479  
480  
481  
482  
483

**Supplemental Fig. 10 KEGG and REACTOME pathways analysis between the EDL non-overload vs. overload.** KEGG pathway analysis showing **a-c** upregulated and **d-f** downregulated pathways in controls (CON), HFpEF, and HFpEF+CR between the EDL non-overload vs. overload (all n = 4). REACTOME analysis of upregulated pathways in **g** CON, **h** HFpEF and **i** HFpEF+CR between contralateral and overloaded muscles (all n = 4). Gene expression levels were quantified by featureCount and normalized by DESeq2 using the negative binomial model. Differentially expressed genes were defined based on adjusted p-value < 0.05. For KEGG pathway analysis, clusterProfiler was used to predict functionally enriched terms and potential pathways involved. The significant terms were selected based on adjusted p-value < 0.05. The adjusted p-value was corrected using Benjamini and Hochberg method.

484 **Supplemental References**

485  
486  
487  
488  
489  
490  
491  
492  
493  
494  
495  
496  
497  
498  
499  
500  
501  
502  
503  
504  
505  
506  
507  
508  
509  
510  
511  
512  
513  
514  
515  
516  
517  
518  
519  
520  
521  
522  
523  
524  
525  
526  
527  
528  
529  
530  
531  
532  
533

1. Adams V, *et al.* Ubiquitin-proteasome-system and enzymes of energy metabolism in skeletal muscle of patients with HFpEF and HFrEF. *ESC Heart Fail* **8**, 2556-2568 (2021).
2. Schauer A, *et al.* ZSF1 rat as animal model for HFpEF: Development of reduced diastolic function and skeletal muscle dysfunction. *ESC Heart Fail* **7**, 2123-2134 (2020).
3. Abdellatif M, *et al.* Nicotinamide for the treatment of heart failure with preserved ejection fraction. *Sci Transl Med* **13**, (2021).
4. Bowen TS, *et al.* Exercise Training Reveals Inflexibility of the Diaphragm in an Animal Model of Patients With Obesity-Driven Heart Failure With a Preserved Ejection Fraction. *Journal of the American Heart Association* **6**, (2017).
5. Bowen TS, *et al.* Effects of Endurance Training on Detrimental Structural, Cellular, and Functional Alterations in Skeletal Muscles of Heart Failure With Preserved Ejection Fraction. *J Card Fail* **24**, 603-613 (2018).
6. Franssen C, *et al.* Myocardial Microvascular Inflammatory Endothelial Activation in Heart Failure With Preserved Ejection Fraction. *J Am Coll Cardiol HF* **4**, 312-324 (2016).
7. Goto K, *et al.* Muscular changes in animal models of heart failure with preserved ejection fraction: what comes closest to the patient? *ESC Heart Fail* **8**, 139-150 (2021).
8. Hamdani N, *et al.* Myocardial titin hypophosphorylation importantly contributes to heart failure with preserved ejection fraction in a rat metabolic risk model. *Circ Heart Fail* **6**, 1239-1249 (2013).
9. Satoh T, *et al.* Metabolic Syndrome Mediates ROS-miR-193b-NFYA-Dependent Downregulation of Soluble Guanylate Cyclase and Contributes to Exercise-Induced Pulmonary Hypertension in Heart Failure With Preserved Ejection Fraction. *Circulation* **144**, 615-637 (2021).
10. van Dijk CG, *et al.* Distinct Endothelial Cell Responses in the Heart and Kidney Microvasculature Characterize the Progression of Heart Failure With Preserved Ejection Fraction in the Obese ZSF1 Rat With Cardiorenal Metabolic Syndrome. *Circ Heart Fail* **9**, e002760 (2016).
11. Frischknecht R, Vrbova G. Adaptation of rat extensor digitorum longus to overload and increased activity. *Pflugers Archiv : European journal of physiology* **419**, 319-326 (1991).
12. Thomson DM, Gordon SE. Impaired overload-induced muscle growth is associated with diminished translational signalling in aged rat fast-twitch skeletal muscle. *J Physiol* **574**, 291-305 (2006).

534  
535 13. Espino-Gonzalez E, *et al.* Abnormal skeletal muscle blood flow, contractile  
536 mechanics and fibre morphology in a rat model of obese-HFpEF. *J Physiol* **599**, 981-  
537 1001 (2021).  
538  
539 14. Hudlická O, Brown M, Cotter M, Smith M, Vrbová G. The effect of long-term  
540 stimulation of fast muscles on their blood flow, metabolism and ability to withstand  
541 fatigue. *Pflügers Archiv* **369**, 141-149 (1977).  
542  
543 15. Tickle PG, Hendrickse PW, Degens H, Egginton S. Impaired skeletal muscle  
544 performance as a consequence of random functional capillary rarefaction can be  
545 restored with overload-dependent angiogenesis. *J Physiol* **598**, 1187-1203 (2020).  
546  
547 16. Bowen TS, *et al.* Heart failure with preserved ejection fraction induces molecular,  
548 mitochondrial, histological, and functional alterations in rat respiratory and limb  
549 skeletal muscle. *European journal of heart failure* **17**, 263-272 (2015).  
550  
551 17. Garnham JO, *et al.* Chronic heart failure with diabetes mellitus is characterized by a  
552 severe skeletal muscle pathology. *J Cachexia Sarcopenia Muscle* **11**, 394-404 (2020).  
553  
554 18. Al-Shammari AA, *et al.* Integrated method for quantitative morphometry and oxygen  
555 transport modeling in striated muscle. *J Appl Physiol (1985)* **126**, 544-557 (2019).  
556  
557 19. Liu F, *et al.* Automated fiber-type-specific cross-sectional area assessment and  
558 myonuclei counting in skeletal muscle. *J Appl Physiol (1985)* **115**, 1714-1724 (2013).  
559  
560 20. Goodman CA, *et al.* Novel insights into the regulation of skeletal muscle protein  
561 synthesis as revealed by a new nonradioactive in vivo technique. *Faseb j* **25**, 1028-  
562 1039 (2011).  
563  
564 21. Dobin A, *et al.* STAR: ultrafast universal RNA-seq aligner. *Bioinformatics* **29**, 15-21  
565 (2013).  
566  
567 22. Liao Y, Smyth GK, Shi W. featureCounts: an efficient general purpose program for  
568 assigning sequence reads to genomic features. *Bioinformatics* **30**, 923-930 (2013).  
569  
570 23. Love MI, Huber W, Anders S. Moderated estimation of fold change and dispersion  
571 for RNA-seq data with DESeq2. *Genome Biol* **15**, 550 (2014).  
572  
573 24. R Development Core Team. A language and environment for statistical computing.  
574 Vienna, Austria, Foundation for Statistical Computing (2022)  
575  
576
